# Supplementary material for: Mitochondrial Phylogenomics yields Strongly Supported Hypotheses for Ascaridomorph Nematodes
Source: PubMed Central journal article supplement (PMC5159812; doi:10.1038/srep39248), 2016-12-16
Supplement: srep39248-s1.pdf [file srep39248-s1.pdf]

## Supplementary Info

# Mitochondrial Phylogenomics yields Strongly Supported Hypotheses for Ascaridomorph Nematodes

**Guo-Hua Liu<sup>1,2</sup>, Steven A. Nadler<sup>3</sup>, Shan-Shan Liu<sup>1</sup>, Magdalena Podolska<sup>4</sup>, Stefano D'Amelio<sup>5</sup>, Renfu Shao<sup>6</sup>, Robin B. Gasser<sup>7,\*</sup> & Xing-Quan Zhu<sup>1,2,\*</sup>**

<sup>1</sup>State Key Laboratory of Veterinary Etiological Biology, Key Laboratory of Veterinary Parasitology of Gansu Province, Lanzhou Veterinary Research Institute, Chinese Academy of Agricultural Sciences, Lanzhou, Gansu Province 730046, P. R. China, <sup>2</sup>College of Veterinary Medicine, Hunan Agricultural University, Changsha, Hunan Province 410128, P. R. China, <sup>3</sup>Department of Entomology and Nematology, University of California, Davis, CA 95616, USA, <sup>4</sup>National Marine Fisheries Research Institute, Kollataja 1, 81-332 Gdynia, Poland, <sup>5</sup>Department of Public Health and Infectious Diseases, Section of Parasitology, Sapienza University of Rome, Rome, Italy, <sup>6</sup>Genecology Research Centre, University of the Sunshine Coast, Queensland 4558, Australia, <sup>7</sup>Faculty of Veterinary and Agricultural Sciences, The University of Melbourne, Parkville, Victoria 3010, Australia. Correspondence and requests for materials should be addressed to R.B.G (email: robinbg@unimelb.edu.au) or X.Q.Z (email: xingquanzhu1@hotmail.com)

**Table S1. Selected mitochondrial genome sequences of ascaridoids used for phylogenetic analysis in the present study, including the outgroups<sup>★</sup>.**

| Species                                     | Family        | Length (bp) | GenBank accession numbers |
|---------------------------------------------|---------------|-------------|---------------------------|
| <i>Anisakis simplex s.l</i>                 | Anisakidae    | 13,916      | NC_007934                 |
| <i>Anisakis simplex s.s.</i>                | Anisakidae    | 13,926      | KC965056                  |
| <i>Ascaridia columbae</i>                   | Ascaridiidae  | 13,931      | JX624729                  |
| <i>Ascaridia gallinae</i>                   | Ascaridiidae  | 13,977      | JX624728                  |
| <i>Ascaridia sp.</i>                        | Ascaridiidae  | 13,862      | JX624730                  |
| <i>Ascaris lumbricoides</i> Korea isolate   | Ascarididae   | 14,281      | NC_016198                 |
| <i>Ascaris lumbricoides</i> China isolate   | Ascarididae   | 14,303      | HQ704900                  |
| <i>Ascaris suum</i> USA isolate             | Ascarididae   | 14,284      | NC_001327                 |
| <i>Ascaris suum</i> China isolate           | Ascarididae   | 14,311      | HQ704901                  |
| <i>Ascaris sp.</i> Chimpanzee               | Ascarididae   | 14,268      | KC839986                  |
| <i>Ascaris sp.</i> Gibbon                   | Ascarididae   | 14,274      | KC839987                  |
| <i>Baylisascaris ailuri</i>                 | Ascarididae   | 14,657      | NC_015925                 |
| <i>Baylisascaris procyonis</i>              | Ascarididae   | 14,781      | NC_016200                 |
| <i>Baylisascaris schroederi</i>             | Ascarididae   | 14,778      | NC_015927                 |
| <i>Baylisascaris transfuga</i>              | Ascarididae   | 14,898      | NC_015924                 |
| <i>Brugia malayi</i> <sup>★</sup>           | Onchocercidae | 13,657      | NC_004298                 |
| <i>Contracaecum ogmorhini s.l.</i> (COAPD)  | Anisakidae    | 14,019      | KU558725                  |
| <i>Contracaecum ogmorhini s.l.</i> (COAPP)  | Anisakidae    | 14,013      | KU558726                  |
| <i>Contracaecum ogmorhini s.l.</i> (COZC)   | Anisakidae    | 14,010      | KU558727                  |
| <i>Contracaecum osculatum s.s.</i>          | Anisakidae    | 13,823      | NC_024037                 |
| <i>Contracaecum rudolphii</i> B             | Anisakidae    | 14,022      | FJ905109                  |
| <i>Cucullanus robustus</i>                  | Cucullanidae  | 13,972      | NC_016128                 |
| <i>Enterobius vermicularis</i> <sup>★</sup> | Oxyuridae     | 14,010      | NC_011300                 |
| <i>Heterakis beramporia</i>                 | Heterakidae   | 14,012      | KU529972                  |
| <i>Heterakis gallinae</i>                   | Heterakidae   | 13,973      | KU529973                  |
| <i>Parascaris univalens</i>                 | Ascarididae   | 13,920      | KM067271                  |
| <i>Pseudoterranova azarasi</i>              | Anisakidae    | 13,954      | KR052144                  |

---

|                                              |             |        |           |
|----------------------------------------------|-------------|--------|-----------|
| <i>Pseudoterranova bulbosa</i>               | Anisakidae  | 13,957 | KU558720  |
| <i>Pseudoterranova cattani</i>               | Anisakidae  | 13,950 | KU558721  |
| <i>Pseudoterranova decipiens s.l. (PDCA)</i> | Anisakidae  | 13,965 | KU558722  |
| <i>Pseudoterranova decipiens s.l. (PDOE)</i> | Anisakidae  | 13,962 | KU558723  |
| <i>Pseudoterranova krabbei</i>               | Anisakidae  | 13,948 | KU558724  |
| <i>Toxocara canis</i> China isolate          | Ascarididae | 14,029 | NC_010690 |
| <i>Toxocara canis</i> Australia isolate      | Toxocaridae | 14,162 | EU730761  |
| <i>Toxocara cati</i>                         | Toxocaridae | 14,029 | NC_010773 |
| <i>Toxocara malaysiensis</i>                 | Toxocaridae | 14,266 | NC_010527 |
| <i>Toxascaris leonina</i>                    | Ascarididae | 14,310 | NC_023504 |
| <i>Thelazia callipaeda</i> ★                 | Thelaziidae | 13,668 | JX069968  |
| <i>Wellcomia siamensis</i> ★                 | Oxyuridae   | 14,128 | GQ332427  |

---

*Contracaecum ogmorhini s.l. (Arctocephalus pusillus doriferus): Contracaecum ogmorhini s.l. (COAPD)*

*Contracaecum ogmorhini s.l. (Arctocephalus pusillus pusillus): Contracaecum ogmorhini s.l. (COAPP)*

*Contracaecum ogmorhini s.l. (Zalophus californianus): Contracaecum ogmorhini s.l. (COZC)*

*Pseudoterranova decipiens s.l. (Chaenocephalus aceratus): Pseudoterranova decipiens s.l. (PDCA)*

*Pseudoterranova decipiens s.l. (Osmerus eperlanus): Pseudoterranova decipiens s.l. (PDOE)*

**Table S2. Sequences of primers for amplifying mitochondrial DNA of *Pseudoterranova decipiens* complex species and *Contracaecum ogmorhini* s.l. samples.**

| Primer   | Sequence (5' to 3')       | Amplification sequences    | Reference  |
|----------|---------------------------|----------------------------|------------|
| For Pk   |                           |                            |            |
| K-1F     | CTACTCTTGTTAGTGGTGCTGTCA  | <i>nad1</i> to <i>nad4</i> | This study |
| K1-R     | AACAACATCCTAGCAGTAGTAGGG  | <i>nad1</i> to <i>nad4</i> | This study |
| K2-F     | GCTTTTTGTTCTATGCCTTTTCTT  | <i>nad4</i> to <i>rrnL</i> | This study |
| K2-R     | TAA AAAACAAGCCTTCTCCTCTCT | <i>nad4</i> to <i>rrnL</i> | This study |
| K3-F     | GTCGTAACCAGATTCTTATGGTAG  | <i>rrnL</i> to <i>rrnS</i> | This study |
| K3-R     | CCAGGTACTAATCTGGTTTGTTTA  | <i>rrnL</i> to <i>rrnS</i> | This study |
| K4-F     | GTTCCAGAATAATCGGCTAGACTT  | <i>rrnS</i> to <i>nad1</i> | This study |
| K4-R     | TAAGACACTCTTTGACTCCTAGCC  | <i>rrnS</i> to <i>nad1</i> | This study |
| For Pdca |                           |                            |            |
| CA1-F    | CTAAGTATGGAATAGTGGGGGCTA  | <i>nad1</i> to <i>nad4</i> | This study |
| CA1-R    | GCAAGAAATACACAGGAAACTTCA  | <i>nad1</i> to <i>nad4</i> | This study |
| CA2-F    | CTCTATGCCTTTTCTTTTGTTTA   | <i>nad4</i> to <i>rrnL</i> | This study |
| CA2-R    | ACAGTCTTAAAAACAAGCCTTCT   | <i>nad4</i> to <i>rrnL</i> | This study |
| CA3-F    | ATGGTAGTGATAAGTTTACATCG   | <i>rrnL</i> to <i>rrnS</i> | This study |
| CA3-R    | TACTCAGCCTCCAAAGATAATTTA  | <i>rrnL</i> to <i>rrnS</i> | This study |
| CA4-F    | CCAGAATAATCGGCTAGACTTTAT  | <i>rrnS</i> to <i>nad1</i> | This study |
| CA4-R    | TTATAACCTCCAACAAGTTCTCTC  | <i>rrnS</i> to <i>nad1</i> | This study |
| For Pc   |                           |                            |            |
| K-1F     | CTACTCTTGTTAGTGGTGCTGTCA  | <i>nad1</i> to <i>nad4</i> | This study |
| K1-R     | AACAACATCCTAGCAGTAGTAGGG  | <i>nad1</i> to <i>nad4</i> | This study |
| K2-F     | GCTTTTTGTTCTATGCCTTTTCTT  | <i>nad4</i> to <i>rrnL</i> | This study |
| K2-R     | TAA AAAACAAGCCTTCTCCTCTCT | <i>nad4</i> to <i>rrnL</i> | This study |
| CA3-F    | ATGGTAGTGATAAGTTTACATCG   | <i>rrnL</i> to <i>rrnS</i> | This study |
| CA3-R    | TACTCAGCCTCCAAAGATAATTTA  | <i>rrnL</i> to <i>rrnS</i> | This study |
| K4-F     | GTTCCAGAATAATCGGCTAGACTT  | <i>rrnS</i> to <i>nad1</i> | This study |
| K4-R     | TAAGACACTCTTTGACTCCTAGCC  | <i>rrnS</i> to <i>nad1</i> | This study |
| For Pdoe |                           |                            |            |
| CF       | TATTATACTAATGATGGTGCTTCT  | <i>cytb</i>                | This study |
| CR       | AACATTGACCCAACCAACT       | <i>cytb</i>                | This study |
| N1-F     | AGGGGAATATGGAGCTTTGTT     | <i>nad1</i> to <i>cytb</i> | This study |
| Cb1-R    | AAAAACTCATCTGGGCTCATACTA  | <i>nad1</i> to <i>cytb</i> | This study |
| Cb-2F    | AGTCATGTTAAGTTGGTTGG      | <i>cytb</i> to <i>nad4</i> | This study |
| N4-2R    | AAAGTCAAATAAACCCCTC       | <i>cytb</i> to <i>nad4</i> | This study |
| N4-3F    | TTGTTGGCTGGTTTGTATTGA     | <i>nad4</i> to <i>cox1</i> | This study |
| C1-3R    | ATTCTTAAAATAGCATACACCATCC | <i>nad4</i> to <i>cox1</i> | This study |
| C1-4F    | GGTTTGACGGGAGTTGTT        | <i>cox1</i> to <i>rrnL</i> | This study |
| R1-4R    | GCTACCTTAATGTCCTCACGCTA   | <i>cox1</i> to <i>rrnL</i> | This study |
| R1-5F    | CGGAGTTAACAGAAAATCATGTC   | <i>rrnL</i> to <i>nad1</i> | This study |
| N1-5R    | AGCACCTACTATTCCGTACTION   | <i>rrnL</i> to <i>nad1</i> | This study |

---

For Pb

|      |                          |                            |            |
|------|--------------------------|----------------------------|------------|
| K1-F | CTACTCTTGTTAGTGGTGCTGTCA | <i>nad1</i> to <i>nad4</i> | This study |
| K1-R | AACAACATCCTAGCAGTAGTAGGG | <i>nad1</i> to <i>nad4</i> | This study |
| B2-F | GACTTTAACCTGTCTTGGG      | <i>nad4</i> to <i>rrnL</i> | This study |
| B2-R | CTACCTTAATGTCCTCAC       | <i>nad4</i> to <i>rrnL</i> | This study |
| B3-F | ATGAAATTGGCCCCTGCTC      | <i>rrnL</i> to <i>rrnS</i> | This study |
| B3-R | TGATGGATGATTTGTACCG      | <i>rrnL</i> to <i>rrnS</i> | This study |
| K4-F | GTTCCAGAATAATCGGCTAGACTT | <i>rrnS</i> to <i>nad1</i> | This study |
| K4-R | TAAGACACTCTTTGACTCCTAGCC | <i>rrnS</i> to <i>nad1</i> | This study |

For *C. ogmorhini*

|       |                          |                            |            |
|-------|--------------------------|----------------------------|------------|
| CO1-F | GGTTTTAGCTGAGCTTAATCGTGC | <i>nad1</i> to <i>cox3</i> | This study |
| CO1-R | GGTTCACCAGATGTATACCAAT   | <i>nad</i> to <i>cox3</i>  | This study |
| CO2-F | GTTATGGATGGTTTTAAG       | <i>cox3</i> to <i>cox1</i> | This study |
| CO2-R | ACTCTGACTAATAATACC       | <i>cox3</i> to <i>cox1</i> | This study |
| CO3-F | GGGCATCCTGAGGTTTATAT     | <i>cox1</i> to <i>rrnL</i> | This study |
| CO3-R | CTATCTCACGATGAATTAAAC    | <i>cox1</i> to <i>rrnL</i> | This study |
| CO4-F | CAATTGTTTTAGAGAGGAGGAGGC | <i>rrnL</i> to <i>rrnS</i> | This study |
| CO4-R | TACAACCTACTCCCCTATAGGC   | <i>rrnL</i> to <i>rrnS</i> | This study |
| CO5-F | GGATAGTGCTGGCAGTTGGT     | <i>rrnS</i> to <i>nad1</i> | This study |
| CO5-R | CTAATTCACCTTCACCCTCA     | <i>rrnS</i> to <i>nad1</i> | This study |

---
